# Supplementary material for: Structure-guided manipulation of the regioselectivity of the cyclosporine A hydroxylase CYP-sb21 from Sebekia benihana
Source: PubMed Central journal article supplement — Synth Syst Biotechnol. 2020 Jul 28;5(3):236–43. doi: 10.1016/j.synbio.2020.07.004 (PMC7394738; doi:10.1016/j.synbio.2020.07.004), 2020-07-28
Supplement: mmc1.pdf [file mmc1.pdf]

## Supplementary Information

### Structure-guided manipulation of the regioselectivity of the cyclosporine A hydroxylase CYP-sb21 from *Sebekia benihana*

Fengwei Li<sup>a,b\*</sup>, Li Ma<sup>a</sup>, Xingwang Zhang<sup>a</sup>, Jingfei Chen<sup>b</sup>, Feifei Qi<sup>b</sup>, Yinyue Huang<sup>a</sup>,  
Zepeng Qu<sup>b</sup>, Lishan Yao<sup>b</sup>, Zhang Wei<sup>a,b</sup>, Eung-Soo Kim<sup>c\*</sup>, Shengying Li<sup>a,b,d\*</sup>

<sup>a</sup>State Key Laboratory of Microbial Technology, Shandong University, Qingdao, Shandong 266237, China

<sup>b</sup>Shandong Provincial Key Laboratory of Synthetic Biology, CAS Key Laboratory of Biofuels, Qingdao Institute of Bioenergy and Bioprocess Technology, Chinese Academy of Sciences, Qingdao, Shandong 266101, China

<sup>c</sup>Department of Biological Engineering, Inha University, Incheon 22212, South Korea

<sup>d</sup>Laboratory for Marine Biology and Biotechnology, Qingdao National Laboratory for Marine Science and Technology, Qingdao, Shandong 266237, China

\*Address correspondence to: [lifengwei@sdu.edu.cn](mailto:lifengwei@sdu.edu.cn) (F.L.), [eungsoo@inha.ac.kr](mailto:eungsoo@inha.ac.kr) (E.-S.K.), [lishengying@qibebt.ac.cn](mailto:lishengying@qibebt.ac.cn) (S.L.)

**Table S1.** Key residues around the substrate binding pocket

| Autodock analysis | MD analysis       | kJ/mol |
|-------------------|-------------------|--------|
| 83Ile             | 83Ile             |        |
| 90Tyr             | 90Tyr             |        |
| 91Leu             | 91Leu             | -9.74  |
| 96Leu             | 96Leu             |        |
| 184Pro            | 184Pro            |        |
| 187Met            | 187Met            | -5.68  |
| 188Aal            | 188Aal            | -0.95  |
| 191Val            | 191Val            | -5.46  |
| 238Leu            | 238Leu            |        |
| 239Thr            | 239Thr            |        |
| 242Leu            | 242Leu            | -12.37 |
| 243Ala            | 243Ala            |        |
| 246Glu            | 246Glu            | -6.92  |
| 247Thr            | 247Thr            |        |
| 290Val            | 290Val            | -6.13  |
| 292Gly            | 292Gly            | -0.71  |
| 293Thr            | 293Thr            |        |
| 295Val            | 295Val            | -2.58  |
| 294Arg            | 294ARG            | -8.96  |
| 316Leu            | 316Leu            | -6.58  |
| 396Met            | 396Met            | -9.75  |
| 397Pro            | 397Pro            | -19.63 |
| 398Ala            | 398Ala            |        |
| 399Ser            | 399Ser            |        |
|                   | 179Met            | -12.73 |
|                   | 34Pro             | -6.44  |
|                   | 33Phe             |        |
|                   | 97Asp             |        |
|                   | 40Ile             |        |
|                   | 319Leu            |        |
|                   | 291Gln            |        |
|                   | 289Pro            |        |
|                   | 31Ala             |        |
|                   | 240Leu            |        |
| <b>Total 24AA</b> | <b>Total 34AA</b> |        |

The key amino acids identified only by MD analysis are colored in red. The energies of amino acids with the greatest energy change (top 10) and non-conservative in Figure 2 are listed. Amino acids that are non-conservative as shown in Figure 2 are marked by green shadows.

**Table S2.** The number of hydrogen bonds between CsA and different cyclophilins

| <b>Hydrogen bonds</b> | <b>Proteins</b> | <b>PDB ID</b> |
|-----------------------|-----------------|---------------|
| 6                     | BmCYP-1         | 1C5F          |
| 5                     | murine_CyPC     | 2RMC          |
| 5                     | CypD            | 2Z6W          |
| 6                     | PfCyP19         | 1QNG          |
| 5                     | SmBz            | 4IPZ          |

**Table S3.** Oligonucleotide primers used in this study

| Mutant sites | Primer (5' - 3')                                                                                            |
|--------------|-------------------------------------------------------------------------------------------------------------|
| E246W        | F:GGTCAC <u>TGG</u> ACCACTGCTCACCTGATCGGTAACGGTACCGCTGC<br>R:AGTGGTCCAGTGACCTGCCAGAACCAGGGTCAGTACCATCGTAAT  |
| E246Y        | F:GGTCAC <u>TAC</u> ACCACTGCTCACCTGATCGGTAACGGTACCGCTGC<br>R:AGTGGTGTAGTGACCTGCCAGAACCAGGGTCAGTACCATCGTAAT  |
| E246L        | F:GGTCAC <u>CTG</u> ACCACTGCTCACCTGATCGGTAACGGTACCGCTGC<br>R:AGTGGTTCAGGTGACCTGCCAGAACCAGGGTCAGTACCATCGTAAT |
| E246A        | F:GGTCAC <u>GCA</u> ACCACTGCTCACCTGATCGGTAACGGTACCGCTGC<br>R:AGTGGTTGCGTGACCTGCCAGAACCAGGGTCAGTACCATCGTAAT  |
| G292A        | F:GTGCAG <u>GCA</u> ACTCGTGTTCGTTATGCAGCAGAGGATGTCGAA<br>R:ACGAGTTGCCTGCACCGGACCACACCAACGCATCAGCTCGT        |
| R294K        | F:GGTACT <u>AAA</u> GTTTCGTTATGCAGCAGAGGATGTCGAACTGG<br>R:CGAACTTTAGTACCCTGCACCGGACCACACCAACGCATCAG         |
| R294L        | F:GGTACT <u>CTG</u> GTTTCGTTATGCAGCAGAGGATGTCGAACTGG<br>R:CGAACCAGAGTACCCTGCACCGGACCACACCAACGCATCAG         |
| M179Q        | F:GCTAAA <u>AAC</u> GTATCCCTGTCTCCGGGTGCAATGGCCGAGC<br>R:GGATACGTTTTTAGCACCCCATTCGCGCCACAGCGGACGG           |
| M179R        | F:GCTAAA <u>CGT</u> GTATCCCTGTCTCCGGGTGCAATGGCCGAGC<br>R:GGATACACGTTTTAGCACCCCATTCGCGCCACAGCGGACGG          |
| M187Q        | F:GGTGCA <u>AAC</u> GCCGAGCCGGTTATCAGCATGGTTGATTACA<br>R:CTCGGCGTTTGCACCCGAGACAGGGATACCATTTTAGCA            |
| M187R        | F:GGTGCA <u>CGT</u> GCCGAGCCGGTTATCAGCATGGTTGATTACA<br>R:CTCGGCACGTGCACCCGAGACAGGGATACCATTTTAGCA            |
| G292F        | F:GTGCAG <u>TTC</u> ACTCGTGTTCGTTATGCAGCAGAGGAT<br>R:ACGAGTGAACCTGCACCGGACCACACCAACGCATCAGCT                |
| G292V        | F:GTGCAG <u>GTT</u> ACTCGTGTTCGTTATGCAGCAGAGGAT<br>R:ACGAGTAACCTGCACCGGACCACACCAACGCATCAG                   |
| M316I        | F:GCAGTG <u>ATT</u> GCAGTACTGGTATCTGCGAACTATGAT<br>R:TACTGCAATCACTGCTTCGCCACGCTTAACGGTCAT                   |
| M316Q        | F:GCAGTG <u>CAA</u> GCAGTACTGGTATCTGCGAACTATGAT<br>R:TACTGCTTGCACTGCTTCGCCACGCTTAACGGTCAT                   |
| V191L        | F:GAGCCG <u>CTG</u> ATCAGCATGGTTGATTACATCCACGAT<br>R:GCTGATCAGCGGCTCGGCCATTGCACCCGGAGACAG                   |
| V191F        | F:GAGCCG <u>TTC</u> ATCAGCATGGTTGATTACATCCACGAT<br>R:GCTGATGAACGGCTCGGCCATTGCACCCGGAGACAG                   |
| V295L        | F:ACTCGT <u>CTG</u> CGTTATGCAGCAGAGGATGTCGAACTG<br>R:ATAACGCAGACGAGTACCCTGCACCGGACCACACCA                   |
| V295F        | F:ACTCGT <u>TTC</u> CGTTATGCAGCAGAGGATGTCGAACTG<br>R:ATAACGGAAACGAGTACCCTGCACCGGACCACACCA                   |
| M396R        | F:CAGCTG <u>CGT</u> CCGGCCTCTTGCGCCTGGCATCCCT<br>R:AGGCCGACGCAGCTGACGTTCCAGTCTTCCGGCGCAA                    |
| M396L        | F:CAGCTG <u>CTG</u> CCGGCCTCTTGCGCCTGGCATCCCT<br>R:AGGCCGGCAGCAGCTGACGTTCCAGTCTTCCGGCGCAA                   |

The mutant sites are shown in red and underlined.

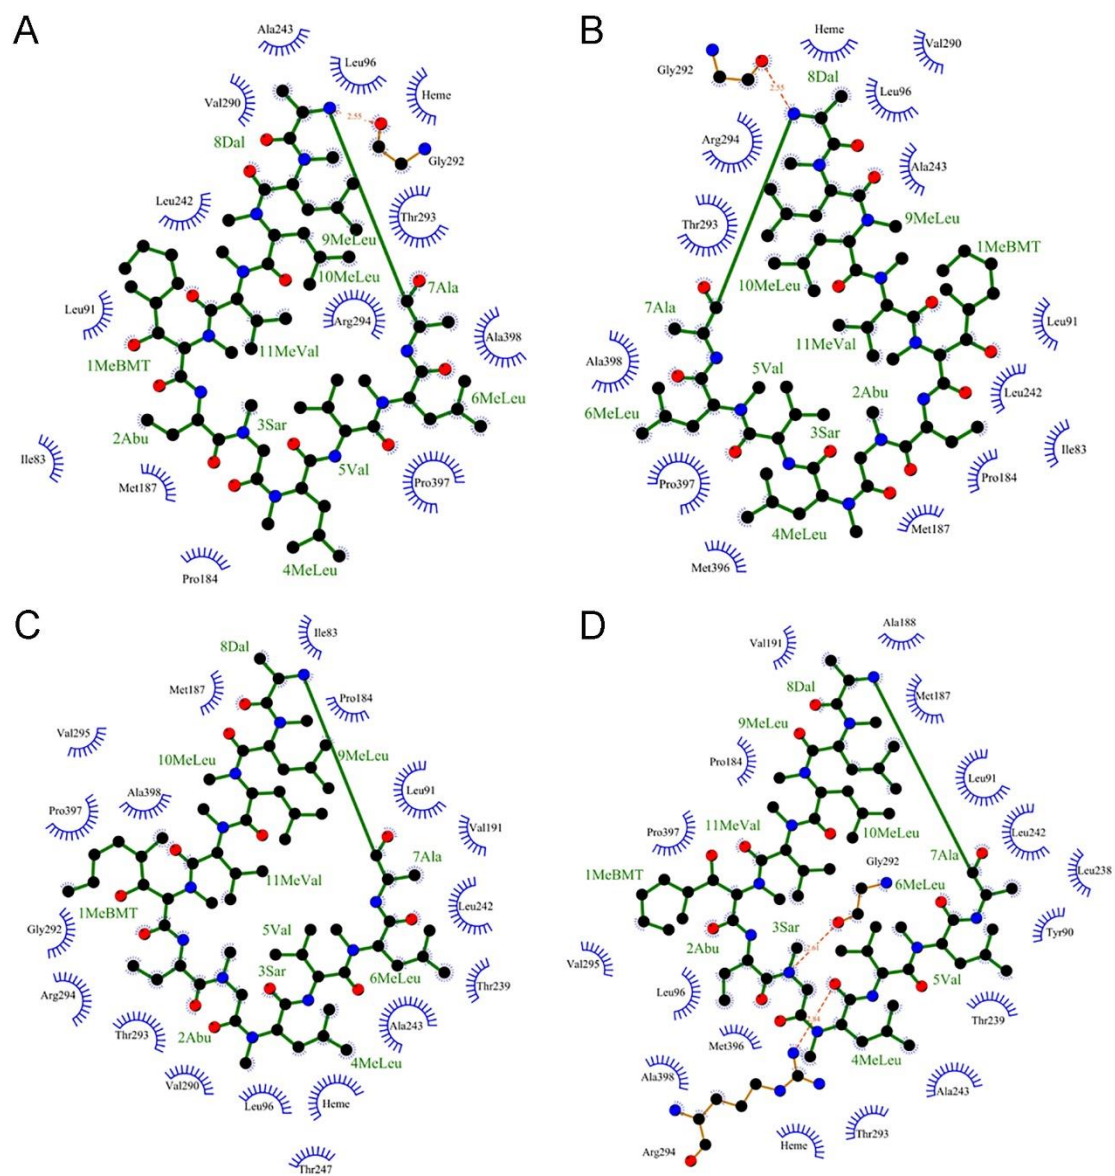

**Figure S1.** A. Key amino acids in pose 2 of CsA. B. Key amino acids in pose 6 of CsA. C. Key amino acids in pose 8 of CsA. D. Key amino acids in pose 9 of CsA. Hydrogen bonds are labelled by red dashed lines.

|      | Pose10 | Pose1 | Pose2 | Pose3 | Pose4 | Pose5 | Pose6 | Pose7 | Pose8  | Pose9  |
|------|--------|-------|-------|-------|-------|-------|-------|-------|--------|--------|
| I83  | Green  | Green | Green | Green | Green | Green | Green | Green | Green  | Green  |
| Y90  |        |       |       |       |       |       |       |       |        | Yellow |
| L91  | Red    | Red   | Red   | Red   | Red   | Red   | Red   | Red   | Red    | Red    |
| L96  | Red    | Red   | Red   | Red   | Red   | Red   | Red   | Red   | Red    | Red    |
| P184 | Red    | Red   | Red   | Red   | Red   | Red   | Red   | Red   | Red    | Red    |
| M187 | Red    | Red   | Red   | Red   | Red   | Red   | Red   | Red   | Red    | Red    |
| A188 |        |       |       | Green |       |       |       | Green |        | Green  |
| V191 |        |       |       | Green |       | Green |       | Green | Green  |        |
| L238 |        |       |       |       |       |       |       |       |        | Yellow |
| T239 |        |       |       |       |       |       |       |       | Yellow |        |
| L242 | Red    | Red   | Red   | Red   | Red   | Red   | Red   | Red   | Red    | Red    |
| A243 | Red    | Red   | Red   | Red   | Red   | Red   | Red   | Red   | Red    | Red    |
| E246 |        |       |       | Green | Green | Green |       | Green |        |        |
| T247 |        |       |       | Green | Green | Green |       | Green | Green  |        |
| V290 | Green  |       | Green |       |       | Green | Green |       | Green  |        |
| G292 | Red    | Red   | Red   | Red   | Red   | Red   | Red   | Red   | Red    | Red    |
| T293 | Red    | Red   | Red   | Red   | Red   | Red   | Red   | Red   | Red    | Red    |
| V295 |        | Green |       | Green |       |       |       | Green | Green  | Green  |
| R294 | Red    | Red   | Red   | Red   | Red   | Red   | Red   | Red   | Red    | Red    |
| L316 |        | Green |       |       |       |       |       | Green |        |        |
| M396 |        |       |       | Green | Green | Green | Green | Green |        | Green  |
| P397 | Red    | Red   | Red   | Red   | Red   | Red   | Red   | Red   | Red    | Red    |
| A398 | Red    | Red   | Red   | Red   | Red   | Red   | Red   | Red   | Red    | Red    |
| S399 |        |       |       |       |       | Green |       |       |        |        |

**Figure S2.** Key amino acids revealed in the top 10 poses of CsA (the distances to substrate are within 5 Å). Red boxes represent the key amino acids seen in all poses; green boxes represent the key amino acids seen in a part of poses; and yellow boxes represent the key amino acids only seen in pose 8 or pose 9.

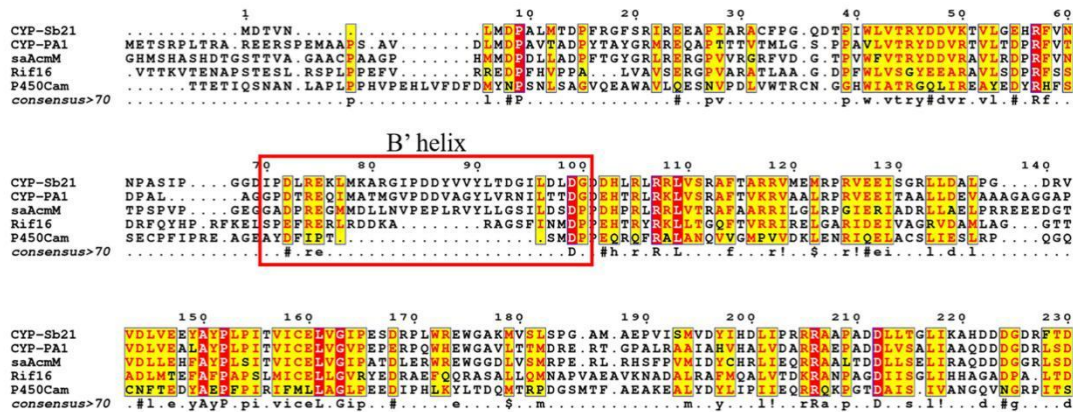

**Figure S3.** Multiple protein sequence alignment of CYP-sb21, CYP-pa1, saAcmM, Rif16, and P450cam with substrates in different sizes and shapes. The substrates of CYP-sb21, CYP-pa1, saAcmM, Rif16, and P450cam are cyclosporine A (MW 1202.6), cyclosporine A (MW 1202.6), actinomycin D (MW 1255.4), rifamycin L (MW 755.8), and camphor (MW 152.2), respectively. The B' helix region is boxed in a red rectangle. Sequence analysis was performed using Expresso through the T-COFFEE online service, and the figure was prepared using ESPript 3.0.

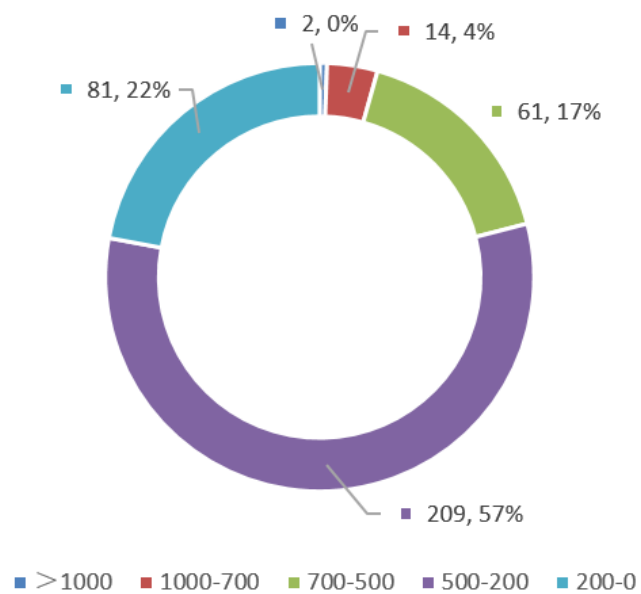

**Figure S4.** Molecular weight distribution of all P450 substrates/ligands in PDB databank (<http://www.rcsb.org/>).



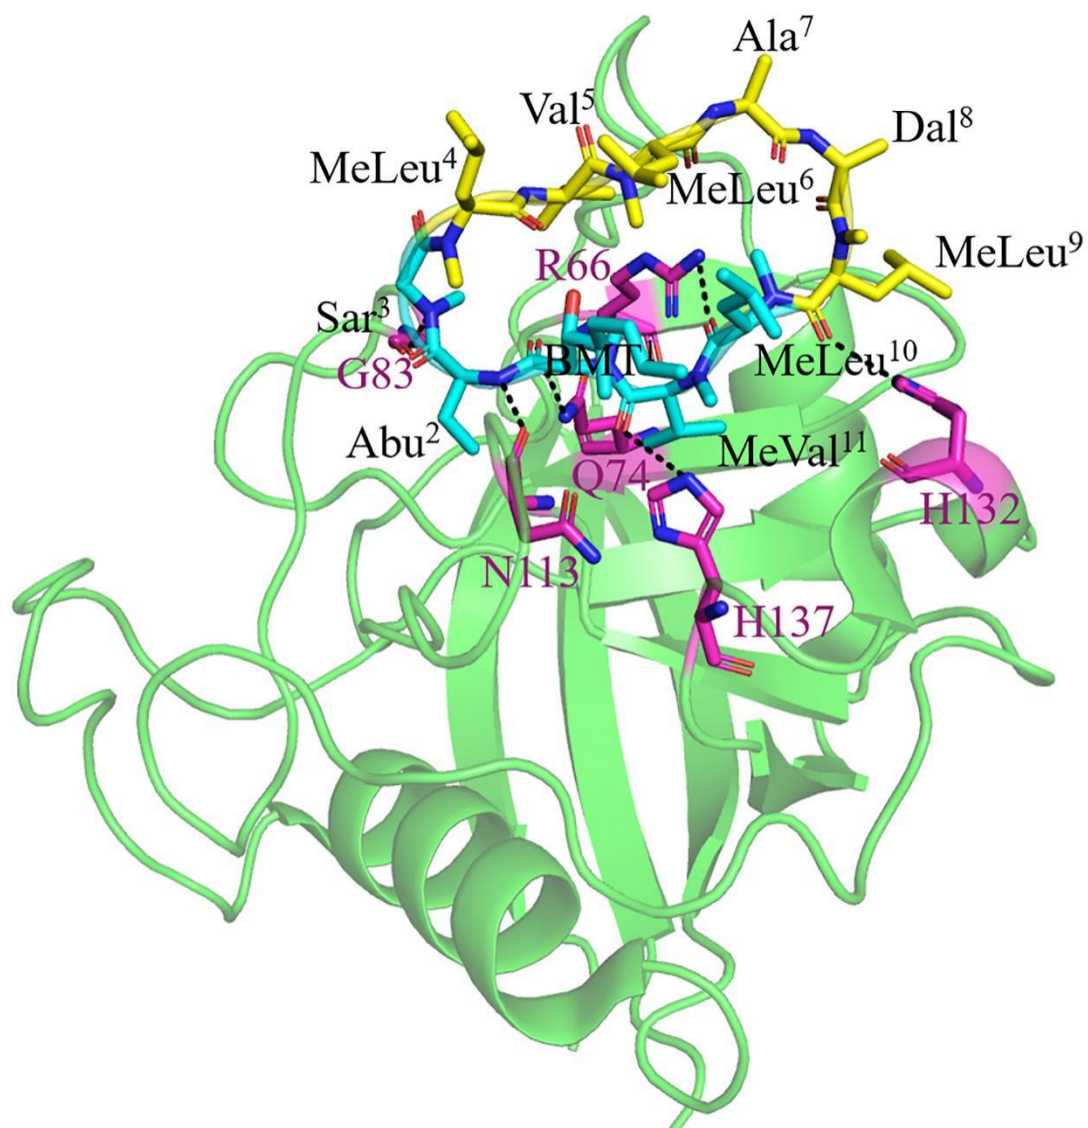

**Figure S5.** The 3D structure of CsA in complex with the cyclophilin BmCYP-1 (PDB ID: 1C5F). CsA is shown as sticks. The amino acids bind in and out of binding pocket are colored in cyan and yellow, respectively. The amino acids contact CsA through hydrogen bonds (labelled by black dashed lines) are shown as sticks in magenta.
